# Supplementary material for: The Role of Ambient Gas and Pressure on the Structuring of Hard Diamond-Like Carbon Films Synthesized by Pulsed Laser Deposition
Source: MDPI journal article supplement (doi:10.3390/ma8063284), 2015-06-05
Supplement: s1 [file s1]

## Supplemental Materials

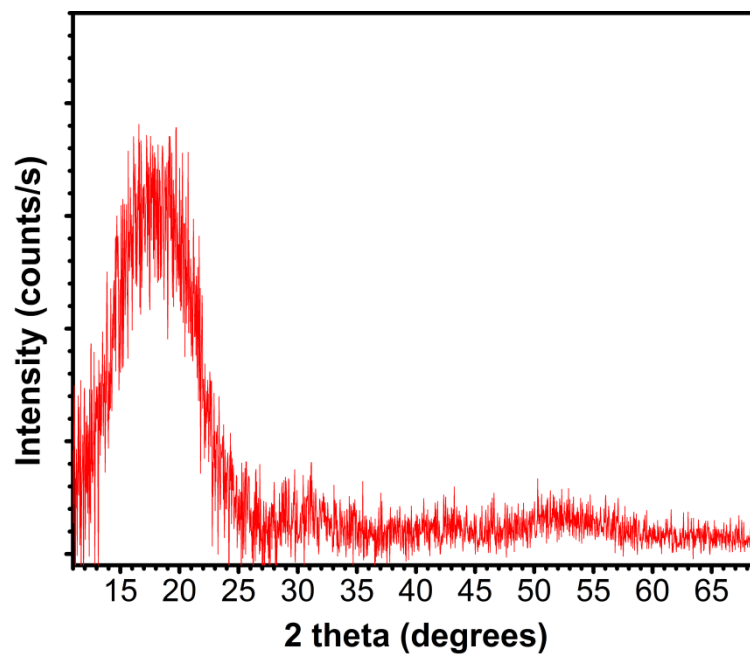

**Figure S1.** Typical GIXRD diffraction pattern of a carbon film synthesized at 200 °C by pulsed laser deposition (PLD) on a bare Si (100) substrate.
